# Supplementary material for: Cloning and Characterization of Trypanosoma congolense and T. vivax Nucleoside Transporters Reveal the Potential of P1-Type Carriers for the Discovery of Broad-Spectrum Nucleoside-Based Therapeutics against Animal African Trypanosomiasis
Source: MDPI journal article supplement (doi:10.3390/ijms24043144), 2023-02-05
Supplement: s1 [file s1]

**Supplemental Figure S1.** Tree of nucleobase transporters from *T. congolense* IL-3000.

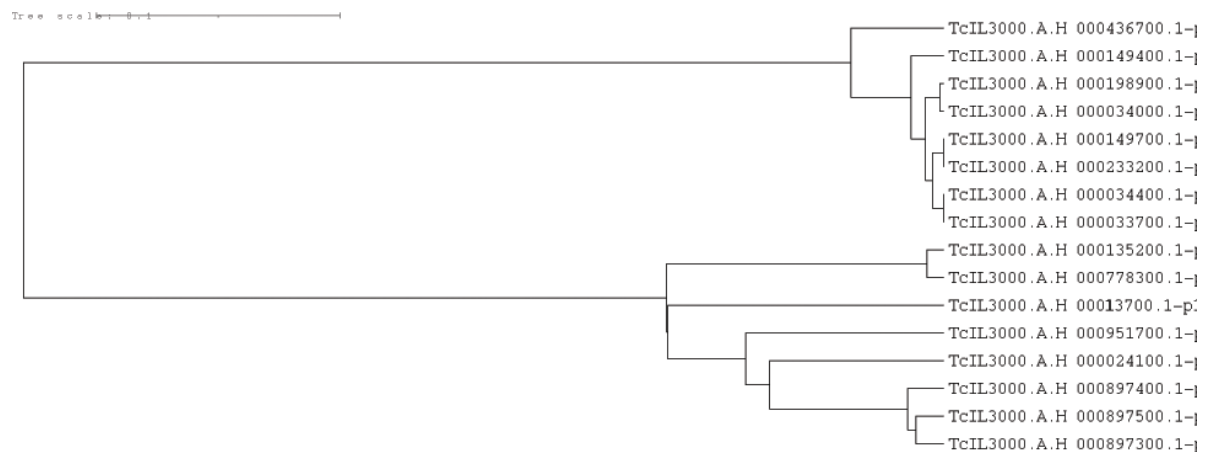

Tree was constructed by CLUSTAL Omega (1.2.3) multiple sequence alignment in TriTrypDB

Made by CLUSTAL Omega (1.2.3) multiple sequence alignment in TriTrypDB

|                             |                                                                 |
|-----------------------------|-----------------------------------------------------------------|
| TcIL3000.A.H_000436700.1-p1 | MASDTSFATKTYVCVTCFILDVCAYWAVETRFLAPIFMASHYKYITGNEHAEPSSVLFWL    |
| TcIL3000.A.H_000149400.1-p1 | MASDTSFATKTYVCVTCFILDVCAYWAVETRFLAPIFMASHYKYITGNEHAEPSSVLFWL    |
| TcIL3000.A.H_000034000.1-p1 | MASDTSFATKTYVCVTCFILDVCAYWAVETRFLAPIFMASHYKYITGNEHAEPSSVLFWL    |
| TcIL3000.A.H_000198900.1-p1 | MASDTSFATKTYVCVTCFILDVCAYWAVETRFLAPIFMASHYKYITGNEHAEPSSVLFWL    |
| TcIL3000.A.H_000033700.1-p1 | MASDTSFATKTYVCVTCFILDVCAYWAVETRFLAPIFMASHYKYITGNEHAEPSSVLFWL    |
| TcIL3000.A.H_000034400.1-p1 | MASDTSFATKTYVCVTCFILDVCAYWAVETRFLAPIFMASHYKYITGNEHAEPSSVLFWL    |
| TcIL3000.A.H_000233200.1-p1 | MASDTSFATKTYVCVTCFILDVCAYWAVETRFLAPIFMASHYKYITGNEHAEPSSVLFWL    |
| TcIL3000.A.H_000149700.1-p1 | MASDTSFATKTYVCVTCFILDVCAYWAVETRFLAPIFMASHYKYITGNEHAEPSSVLFWL    |
| TcIL3000.A.H_000778300.1-p1 | MALGFSSAAEVVVYTCTIFLGMSILLPLNTRYSAFMFMINYKYVTGDENAEPNSKLFWA     |
| TcIL3000.A.H_000135200.1-p1 | MALGFSSAAEVVVYTCTIFLGMSILLPLNTRYSAFMFMINYKYVTGDENAEPNSKLFWA     |
| TcIL3000.A.H_000113700.1-p1 | MALGFSSAAEVVVYTCTIFLGMSILLPLNTRYSAFMFMINYKYVTGDENAEPNSKLFWA     |
| TcIL3000.A.H_000951700.1-p1 | MALGLSSSAAEVVVYTCLFLGVSIILLPLNTRYSAFMFMINYKYVTGDENAKPNSVLFWA    |
| TcIL3000.A.H_000024100.1-p1 | MALGLSSSAAEVVVYTCTIFLGVSILLPSSTRYSAPMFMVNYKYVTGDENAEPNSVLFWA    |
| TcIL3000.A.H_000897400.1-p1 | MALGFSSAAEVVVYTCLLLGMSILLPLNTRYSAFMFMVNYYKYVTGDENAEPNSVLFWA     |
| TcIL3000.A.H_000897300.1-p1 | MALGFSSSAAEVVVYTCLLLGVSILLPLNTRYSAFMFMVNYYKYVTGDENAEPNSVLFWA    |
| TcIL3000.A.H_000897500.1-p1 | MALGFSSSAAEVVVYTCLLLGVSILLPLNTRYSAFMFMVNYYKYVTGDENAEPNSVLFWA    |
|                             | :**.:***:**.*:*.* **                                            |
| TcIL3000.A.H_000436700.1-p1 | NIFTFHNLILFAARALAERPELERFVRGWGLRLRFTLSIVLILAEALIFFLPVLSMPLP     |
| TcIL3000.A.H_000149400.1-p1 | NIFTFHNLILFAARALAERPELERFVRGWGLRLRFTLSIVLILAEALIFFLPVLSMPLP     |
| TcIL3000.A.H_000034000.1-p1 | NIFTFYNLILFAARALAERPELERLRVGWLRLRFTLSIVLILAEALIFFLPVLSMSPP      |
| TcIL3000.A.H_000198900.1-p1 | NIFTFYNLILFAARALAERPELERLRVGWLRLRFTLSIVLILAEALIFFLPVLSMSPP      |
| TcIL3000.A.H_000033700.1-p1 | NIFTFHNLILFAARALAERPELERLRVGWLRLRFTLSIVLILAEALIFFLPVLSMSPP      |
| TcIL3000.A.H_000034400.1-p1 | NIFTFHNLILFAARALAERPELERLRVGWLRLRFTLSIVLILAEALIFFLPVLSMSPP      |
| TcIL3000.A.H_000233200.1-p1 | NIFTFHNLILFAARALAERPELERLRVGWLRLRFTLSIVLILAEALIFFLPVLSMSPP      |
| TcIL3000.A.H_000149700.1-p1 | NIFTFHNLILFAARALAERPELERLRVGWLRLRFTLSIVLILAEALIFFLPVLSMSPP      |
| TcIL3000.A.H_000778300.1-p1 | NILTFYGAISLVLIQSLVGPTVLTQAARRLSLSVRFTLSITSMIMEVFVVLMPVIKVSQT    |
| TcIL3000.A.H_000135200.1-p1 | NILTFYGAISLVLIQSLVGPTVLTQAARRLSLSVRFTLSITSMIMEVFVVLMPVIKVSQT    |
| TcIL3000.A.H_000113700.1-p1 | NILTFYGVISLVTQSLIGTAVFTSTICRVLSLSRFALSTIFMMIEFFVVMPIKVSQT       |
| TcIL3000.A.H_000951700.1-p1 | NILTFYTVISLVTQSFGVPTVLTQTVRRLSLSLRFALSTITLMMTEVFVVLMLPITIKVSQT  |
| TcIL3000.A.H_000024100.1-p1 | NILTFYTVISLVTQSFGVPTVLTQTVRRLSLSLRFTLSITLMMVEVFVVLMLPVIKVSQT    |
| TcIL3000.A.H_000897400.1-p1 | NILTFYNVISLVTQSLIGTPTVLTPTVRRLSLSLRFALSTIFMMMEVFVVLMLPVIKVSQT   |
| TcIL3000.A.H_000897300.1-p1 | NILTFYNVISLVTQSLIGTPTVLTPTVRRLSLSLRFALSTIFMMMEVFVVLMLPVIKVSQT   |
| TcIL3000.A.H_000897500.1-p1 | NILTFYNVISLVTQSLIGTPVLTPTVRRLSLSLRFALSTIFMMMEVFVVLMLPVIKVSQT    |
|                             | **:**: * :. :: : : . : :*:***. :. *. :::*: :                    |
| TcIL3000.A.H_000436700.1-p1 | NAIVSLCFTTILGTIGKQFLGRTHTLWDFFLTEKAGGVIRLTAFLVAIVHATLCIIVVV     |
| TcIL3000.A.H_000149400.1-p1 | NAIVSLCFTTILGTIGKQFLGRTHTLWDFFLTEKAGGVIRLTAFLVAIVHAMLCIIVVV     |
| TcIL3000.A.H_000034000.1-p1 | YAIVSLCFTTILGTIGKQFLGRTHTLWDFFLTEKAGGVMRFTAFLVAIVHATLCIIVVV     |
| TcIL3000.A.H_000198900.1-p1 | YAIVSLCFTTILGTIGKQFLGRTHTLWDFFLTEKAGGVMRFTAFLVAIVHATLCIIVVV     |
| TcIL3000.A.H_000033700.1-p1 | YAIVSLCFTTILGTIGKQFLGRTHTLWDFFLTEKAGGVIRLTAFLVAIVHAMLCIIVVV     |
| TcIL3000.A.H_000034400.1-p1 | YAIVSLCFTTILGTIGKQFLGRTHTLWDFFLTEKAGGVIRLTAFLVAIVHAMLCIIVVV     |
| TcIL3000.A.H_000233200.1-p1 | YAIVSLCFTTILGTIGKQFLGRTHTLWDFFLTEKAGGVIRLTAFLVAIVHATLCIIVVV     |
| TcIL3000.A.H_000149700.1-p1 | YAIVSLCFTTILGTIGKQFLGRTHTLWDFFLTEKAGGVIRLTAFLVAIVHATLCIIVVV     |
| TcIL3000.A.H_000778300.1-p1 | TAIVFFVIVTIIVGGIGKCYLEATCYTLVAPLPKPFKMSTIMFGICFCGVVSTIQCI IKAS  |
| TcIL3000.A.H_000135200.1-p1 | TAIVFFVIVTIIVGGIGKCYLEATCYTLVAPLPKPFKMSTIMFGICFCGVVSTIQCI IKAS  |
| TcIL3000.A.H_000113700.1-p1 | TAIVFFVIVTIIVGGIKWCYLEATCYTLVAPHVPKPFKMSTIMFSCFCGAISTIRCI IKAS  |
| TcIL3000.A.H_000951700.1-p1 | TAIVFFVIATILGGMGKPCLEATSYTLAASMPKEKFTSTIMFGISICGLLTSMMQCIVKLS   |
| TcIL3000.A.H_000024100.1-p1 | VAIVFFVIVTIIVGGIGKCYLEATCYTLVAPLPKPFKMSTIMFGISICGVLTTSTMQCIIKVS |
| TcIL3000.A.H_000897400.1-p1 | VAIVFFVIVTIIVGGMGKSYLEATSYTLAASMPKFKMSTIMFGISICGVLTTSTMQCIIKVS  |
| TcIL3000.A.H_000897300.1-p1 | VAIVFFVIVTIIVGGMGKCYLEATSYTLAASMPKFKMSTIMFGISFCGMTLSTMQCIIKVS   |
| TcIL3000.A.H_000897500.1-p1 | VAIVFFVIVAILGGMGKCYLEATSYTLAASMPKFKMSTIMFGISICGVLTTSTMQCIIKVS   |
|                             | ***: :. *: : * * *: : : : :. :. :. **:                          |
| TcIL3000.A.H_000436700.1-p1 | P GTTGESRENTLSLHTVVYAVVLVIALVMVLSLSLIRCTREGFRSAQRAAQKGRVEGINH   |
| TcIL3000.A.H_000149400.1-p1 | P GTTGESRENTLSLHTVVYAVVLVIALVMVLSLSLIRCTREGFRSAQRAAQKGRVEGINH   |
| TcIL3000.A.H_000034000.1-p1 | P GTTGESRENTLSLHTVVYAVVLVIALVMVLSLSLIRCTREGFRSAQRAAQKGRVEGINH   |
| TcIL3000.A.H_000198900.1-p1 | P GTTGESRENTLSLHTVVYAVVLVIALVMVLSLSLIRCTREGFRSAQRAAQKGRVEGINH   |
| TcIL3000.A.H_000033700.1-p1 | P GTTGESRENTLSLHTVVYAVVLVIALVMVLSLALIRCTREGFRSAQRAAQKGRVEGINH   |
| TcIL3000.A.H_000034400.1-p1 | P GTTGESRENTLSLHTVVYAVVLVIALVMVLSLALIRCTREGFRSAQRAAQKGRVEGINH   |
| TcIL3000.A.H_000233200.1-p1 | P GTTGESRENTLSLHTVVYAVVLVIALVMALSLSLIRCTREGFRSAQRAAQKGRVEGINH   |
| TcIL3000.A.H_000149700.1-p1 | P GTTGESRENTLSLHTVVYAVVLVIALVMALSLSLIRCTREGFRSAQRAAQKGRVEGINH   |
| TcIL3000.A.H_000778300.1-p1 | MEDTYESHILTQSYIYFSALLFMMAALVMALSRLRNSYAQMVAEYRVLKQKQEGQKV EP    |
| TcIL3000.A.H_000135200.1-p1 | MEDTYESHILTQSYIYFSALLFMMAALVMALSRLRNSYAQMVAEYRVLKQKQEGQKV EP    |
| TcIL3000.A.H_000113700.1-p1 | MEDTYESHILTQSYIYFSALLIMAVALVMVLTLYHNSYAQQHVAEFRVLKQKH DENNV EP  |
| TcIL3000.A.H_000951700.1-p1 |                                                                 |

```

TcIL3000.A.H_000034000.1-p1      LIERVGKTR-KTLESIRVRLHAQSDPILRNEVQKEHQAKRETVEAQEDIRRR----- 292
TcIL3000.A.H_000198900.1-p1      LIERVGKTR-KTLESIRVRLHAQSDPILRNEVQKEHQAKRETVEAQEDIRRR----- 292
TcIL3000.A.H_000033700.1-p1      LIERVGKTR-KTLESIRVRLHAQSDPILRNEVQKEHQAKRETVEAQEDIRRR----- 292
TcIL3000.A.H_000034400.1-p1      LIERVGKTR-KTLESIRVRLHAQSDPILRNEVQKEHQAKRETVEAQEDIRRR----- 292
TcIL3000.A.H_000233200.1-p1      LIERVGKTR-KTLESIRVRLHAQSDPILRNEVQKEHQAKRETVEAQEDIRRR----- 292
TcIL3000.A.H_000149700.1-p1      LIERVGKTR-KTLESIRVRLHAQSDPILRNEVQKEHQAKRETVEAQEDIRRR----- 292
TcIL3000.A.H_000778300.1-p1      Q--PVADVPEKVEKPTDGEED----PQ----NKEENKGEGEVGMTTAEQLAATAVMPVVK 290
TcIL3000.A.H_000135200.1-p1      Q--PVADVPTGKPTCGEEG----PQ----NKEESKGEGEVGMTTAEQLAATAVMPVVK 290
TcIL3000.A.H_000113700.1-p1      Q--PVADVPEKVEKPTGCEDEK---C-----DVDSKGEGCMTTAEQLAATPIMPVVR 251
TcIL3000.A.H_000951700.1-p1      Q--TAADVPTGKPTDVEDK----S-----DVDSRGEGGMMTTAEQLVATPIMPVVR 286
TcIL3000.A.H_000024100.1-p1      Q--PVADVPTGKPTSCCEDEK---C-----DVDSKEEGCITTAEQLSPTPIMPVVR 286
TcIL3000.A.H_000897400.1-p1      Q--PVADVPTGKPTGVEDQ----C-----EVDNKGEGGMMTTAEQLAATPIMPVVR 286
TcIL3000.A.H_000897300.1-p1      Q--PVADVPTGKPTGVEDQ----C-----EVDNSGEGGMMTTAEQLAATPIMPVVR 286
TcIL3000.A.H_000897500.1-p1      Q--PVADVPTGKPTGVEDQ----C-----EVDNKGEGGMMTTAEQLAATPIMPVVR 286
      .... : * . . : : *:

TcIL3000.A.H_000436700.1-p1      LKDEASISAL-----SRLAEFEAEWARPLPPEASSDGGNRDVAYSQPQAPDVV 339
TcIL3000.A.H_000149400.1-p1      LKDEASISAL-----SRLAEFEAEWARPLPPEASSDGGNRDVAYSQPQAPDVV 339
TcIL3000.A.H_000034000.1-p1      LKDEASISAL-----SRLAEFEAEWARPLPPEASSDGGNRDVAYSQPQAPDVV 339
TcIL3000.A.H_000198900.1-p1      LKDEASISAL-----SRLAEFEAEWARPLPPEASSDGGNRDVAYSQPQAPDVV 339
TcIL3000.A.H_000033700.1-p1      LKDEASISAL-----SRLAEFEAEWARPLPPEASSDGGNRDVAYSQPQAPDVV 339
TcIL3000.A.H_000034400.1-p1      LKDEASISAL-----SRLAEFEAEWARPLPPEASSDGGNRDVAYSQPQAPDVV 339
TcIL3000.A.H_000233200.1-p1      LKDEASISAL-----SRLAEFEAEWARPLPPEASSDGGNRDVAYSQPQAPDVV 339
TcIL3000.A.H_000149700.1-p1      LKDEASISAL-----SRLAEFEAEWARPLPPEASSDGGNRDVAYSQPQAPDVV 339
TcIL3000.A.H_000778300.1-p1      MIHMMLLSCLGFFVTIFIFPNLIIPIDRTHKWFATIAALIFNIG-KSIGSFSTS----- 344
TcIL3000.A.H_000135200.1-p1      MIHMMLLSCLGFFVTIFIFPNLIIPIDRTHKWFATIAALIFNIG-KSIGSFSTS----- 344
TcIL3000.A.H_000113700.1-p1      IIRTVLISCLGFFLTIFIFPTLVVPIRVDWDFSTIAALVYNIG-YSIGSFSTS----- 305
TcIL3000.A.H_000951700.1-p1      IIRMLLISCLGFFLTIFIFPSLIPIDRADDWDFSTIAALIFNIG-NSIGSFSTS----- 340
TcIL3000.A.H_000024100.1-p1      IIRVMLISCLGFFLTIFIFPSFGIPIDRVDDWDFSTIAALIFNVG-KSIGSFSTS----- 340
TcIL3000.A.H_000897400.1-p1      IIRMLLISCLGFFLTIFIFPSLVIPIDRVDDWDFSTIAALVYNIG-NSIGSFSTS----- 340
TcIL3000.A.H_000897300.1-p1      IIRMLLISCLGFFLTIFIFPSLVIPIDRVDDWDFSTIAALIFNIG-NSIGAFSTS----- 340
TcIL3000.A.H_000897500.1-p1      IIRMLLISCLGFFLTIFIFPSLVIPIDRVDDWDFSTIAALIFNIG-NSIGAFSTS----- 340
      :      :*:      :      .*      :      . *      : * .

TcIL3000.A.H_000436700.1-p1      LRQKSTPRPLASS----- 352
TcIL3000.A.H_000149400.1-p1      ----- 339
TcIL3000.A.H_000034000.1-p1      ----- 339
TcIL3000.A.H_000198900.1-p1      ----- 339
TcIL3000.A.H_000033700.1-p1      ----- 339
TcIL3000.A.H_000034400.1-p1      ----- 339
TcIL3000.A.H_000233200.1-p1      ----- 339
TcIL3000.A.H_000149700.1-p1      ----- 339
TcIL3000.A.H_000778300.1-p1      FKMFMYPRGVVLYGSIVRFLLIIPFMLSIIYKHIPGHTVPYIFSFILGLTHYFPVLSMVY 404
TcIL3000.A.H_000135200.1-p1      FKMFMYPRGVVLYGSIVRFLLIIPFMLSIIYKHIPGHTVPYIFSFILGLTHYFPVLSMVY 404
TcIL3000.A.H_000113700.1-p1      FETFRYPRRVVLYGS----- 320
TcIL3000.A.H_000951700.1-p1      FETFRYPRRVVLYGSIVRFLLIIPFMLSIIYKHIPGHTVPYIFSFILGLTHYFPVLSMVY 400
TcIL3000.A.H_000024100.1-p1      SEMFMHPRGVALYWSIVRFLLIIPFMLSIIYKHITGHVVPYIFSFILGLTHQVSVLSMVY 400
TcIL3000.A.H_000897400.1-p1      FETFRYPRRVVLYGSIVRFLLIIPFVLSIIYKIIPGHVGPYIFSFILGLTHQVAVLSMVY 400
TcIL3000.A.H_000897300.1-p1      FETFRYPRRVVLYGIIIVRFLLIIPFMLSIIYKIIPGHVGPYIFSFILGLTHQVAVLSMVY 400
TcIL3000.A.H_000897500.1-p1      FETFRYPRRVVLYGSIVRFLLIIPFVLSIIYKIIPGHVGPYIFSFILGLTHQVAVLSMVY 400

TcIL3000.A.H_000436700.1-p1      ----- 352
TcIL3000.A.H_000149400.1-p1      ----- 339
TcIL3000.A.H_000034000.1-p1      ----- 339
TcIL3000.A.H_000198900.1-p1      ----- 339
TcIL3000.A.H_000033700.1-p1      ----- 339
TcIL3000.A.H_000034400.1-p1      ----- 339
TcIL3000.A.H_000233200.1-p1      ----- 339
TcIL3000.A.H_000149700.1-p1      ----- 339
TcIL3000.A.H_000778300.1-p1      PTPGLDDGQKLMAGQLMGIALLVGVSAAASVVAMIVVIFLPQD 447
TcIL3000.A.H_000135200.1-p1      PTPGLDDGQKLMAGQLMGIALLVGVSAAASVVAMIVVIFLPQD 447
TcIL3000.A.H_000113700.1-p1      ----- 320
TcIL3000.A.H_000951700.1-p1      PVTHGLNDGQKLMAGRLMGMAALLGASAAASVVAMTVVIFLP-- 441
TcIL3000.A.H_000024100.1-p1      PITGLNDGQKLIIEGQLIGIALLVGASAAASVAMVVVIFLPD 443
TcIL3000.A.H_000897400.1-p1      PITPGLNDGQKLMGTGQLMGIALLVGASAAASVVAMIVVIFLP-- 441
TcIL3000.A.H_000897300.1-p1      PITPGLNDGQKLMAGQLMGIALLAGATAASVSAMIVVIFLP-- 441
TcIL3000.A.H_000897500.1-p1      PITPGLNDGQKLMAGQLMSIALLAGASAAASVVAMIVVIFLP-- 441

```

**Supplemental Table S1.** *T. congolense* nucleobase gene family

IL3000 (2019) sequences and IDs from TriTrypDB (<https://tritrypdb.org/tritrypdb/app>)

TMD prediction: <https://services.healthtech.dtu.dk/service.php?TMHMM-2.0>

E value for ENT family from Panther via TriTrypDB

| TriTrypDB gene ID           | a.a. | TMDs | E-value for ENT |
|-----------------------------|------|------|-----------------|
| TcIL3000.A.H_000436700.1-p1 | 352  | 6    | 1.7E-19         |
| TcIL3000.A.H_000149400.1-p1 | 339  | 6    | 2.0E-19         |
| TcIL3000.A.H_000034000.1-p1 | 339  | 6    | 1.6E-21         |
| TcIL3000.A.H_000198900.1-p1 | 339  | 6    | 1.6E-21         |
| TcIL3000.A.H_000033700.1-p1 | 339  | 6    | 2.0E-19         |
| TcIL3000.A.H_000034400.1-p1 | 339  | 6    | 2.0E-19         |
| TcIL3000.A.H_000233200.1-p1 | 339  | 6    | 2.0E-19         |
| TcIL3000.A.H_000149700.1-p1 | 339  | 6    | 2.3E-19         |
| TcIL3000.A.H_000778300.1-p1 | 447  | 11   | 0               |
| TcIL3000.A.H_000135200.1-p1 | 447  | 11   | 0               |
| TcIL3000.A.H_000113700.1-p1 | 320  | 7    | 4.5E-95         |
| TcIL3000.A.H_000951700.1-p1 | 441  | 10   | 0               |
| TcIL3000.A.H_000024100.1-p1 | 443  | 10   | 0               |
| TcIL3000.A.H_000897400.1-p1 | 441  | 11   | 0               |
| TcIL3000.A.H_000897300.1-p1 | 441  | 11   | 0               |
| TcIL3000.A.H_000897500.1-p1 | 441  | 11   | 0               |

**Supplementary Table S2: List of primers used, their sequences and purposes**

| Primer  | Sequence                                                            | Function                               | Restriction site |
|---------|---------------------------------------------------------------------|----------------------------------------|------------------|
| HDK1761 | CTTCCACTTGTC AAGCGAATT <b>CCATATG</b> ATGCTCGGTTTTGA<br>ATCCATTTCCG | Forward primer for<br>TcoAT1           | <i>NdeI</i>      |
| HDK1762 | CTCAGTGGTGGTGGTGGTGGT <b>GCTCGAG</b> CCACTCTGGCAG<br>GGCC           | Reverse primer for<br>TcoAT1           | <i>XhoI</i>      |
| HDK1763 | CTTCCACTTGTC AAGCGAATT <b>CCATATG</b> ATGGCAGTGTTAG<br>GGTTTGAGTCC  | Forward primer for<br>TvY486_0202110   | <i>NdeI</i>      |
| HDK1764 | CTCAGTGGTGGTGGTGGTGGT <b>GCTCGAG</b> CAGCGTCTTGCTC<br>AGTCCTATTGC   | Reverse primer for<br>TvY486_0202110   | <i>XhoI</i>      |
| HDK1765 | CTTCCACTTGTC AAGCGAATT <b>CCATATG</b> ATGCTAGGCTTCGA<br>GTCCACCTC   | Forward primer for<br>TvY486_1112030   | <i>NdeI</i>      |
| HDK1766 | CTCAGTGGTGGTGGTGGTGGT <b>GCTCGAG</b> AAGCAACTTGCT<br>CAGTCCTATTGC   | Reverse primer for<br>TvY486_1112030   | <i>XhoI</i>      |
| HDK1767 | CTTCCACTTGTC AAGCGAATT <b>CCATATG</b> ATGGGGTTACTGG<br>GGTTTGAGTCG  | Forward primer for<br>TvY486_0043680   | <i>NdeI</i>      |
| HDK1768 | CTCAGTGGTGGTGGTGGTGGT <b>GCTCGAG</b> CAAGTGCTTCTCC<br>AAACCCAGTGC   | Reverse primer for<br>TvY486_0043680   | <i>XhoI</i>      |
| HDK1769 | CTTCCACTTGTC AAGCGAATT <b>CCATATG</b> ATGGGGTTGCTGG<br>GTTTGAGTCG   | Forward primer for<br>TvY486_0014570   | <i>NdeI</i>      |
| HDK1770 | CTCAGTGGTGGTGGTGGTGGT <b>GCTCGAG</b> CCGTCCGCGGGA<br>TGGGTG         | Reverse primer for<br>TvY486_0014570   | <i>XhoI</i>      |
| HDK1734 | CGACCTTACACCTCTACTTGTC                                              | Reverse primer for<br>pNUS-HcN plasmid |                  |
| HDK340  | CGTGGAGCAGCTGAAGGACA                                                | Reverse primer for<br>pNUS-HcN plasmid |                  |

Sequence in bold represent restriction sites. Sequence in lower case represent intended mutation.
